# Supplementary material for: Functional microarray analysis of differentially expressed genes in granulosa cells from women with polycystic ovary syndrome related to MAPK/ERK signaling
Source: PubMed Central journal article supplement (PMC4602237; doi:10.1038/srep14994), 2015-10-13

**Title:** Functional microarray analysis of differentially expressed genes in granulosa cells from women with polycystic ovary syndrome related to MAPK/ERK signaling

**Author:** Chen-Wei Lan<sup>1,2</sup>, Mei-Jou Chen<sup>2</sup>, Kang-Yu Tai<sup>4</sup>, Danny CW Yu<sup>2</sup>, Yu-Chieh Yang<sup>2</sup>, Pey-Shyan Jan<sup>2</sup>, Yu-Shih Yang<sup>2</sup>, Hsin-Fu Chen<sup>1,2,3\*</sup>, Hong-Nerng Ho<sup>1,2,3\*</sup>

**Supplementary Figure S1** Full-length blots for the data in Figure 4.

Fig. 4 (A)

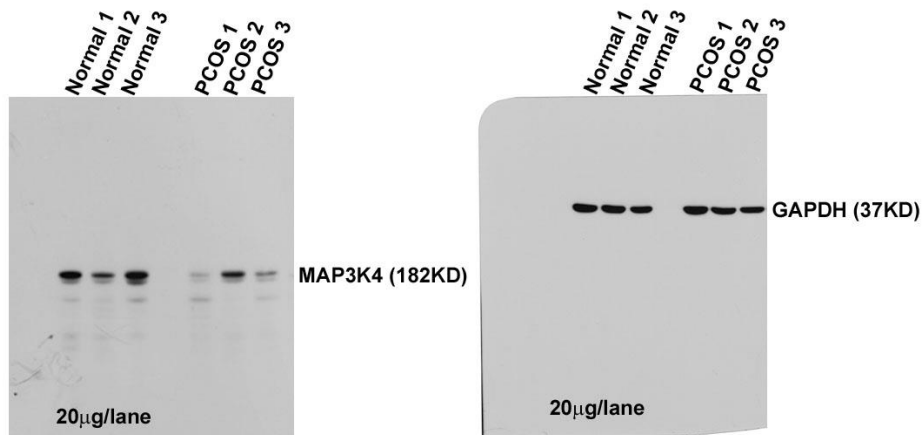

Fig. 4 (B)

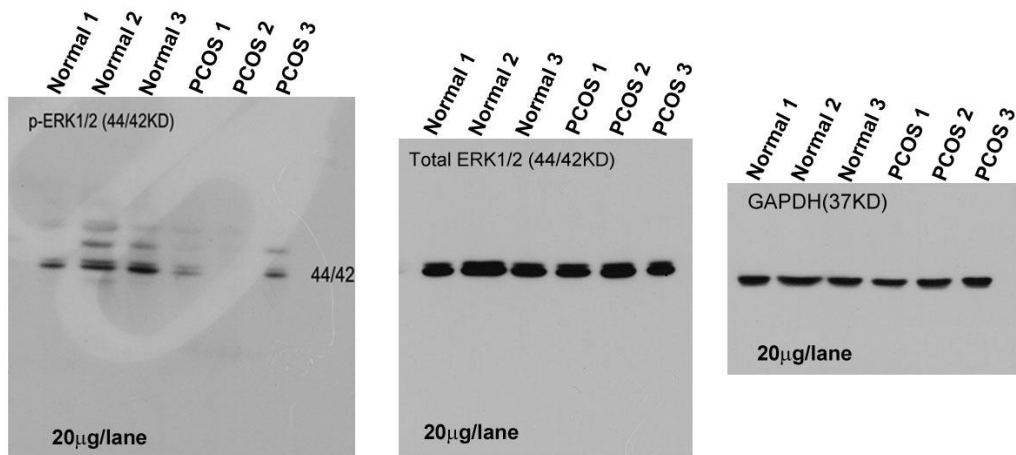

Supplement: srep14994-s1.pdf [file srep14994-s1.pdf]
